# Supplementary material
Source: publisher figshare collection journal article supplement (https://gsapubs.figshare.com/ndownloader/files/26338321)
Supplement: Supplementary file 1 [file 26338321]

## SUPPLEMENTAL MATERIAL

### Phanerozoic variation in dolomite abundance linked to oceanic anoxia

A literature search was performed using Google Scholar with a search term such as “Early Triassic carbonate”, and then the literature was compiled based on the result. On average, ~300 search items are required to collect ~50 study sections, because most collected sections lack lithological logs or well-constrained age by biostratigraphy and/or chemostratigraphy. For a certain region/basin, up to 5 sections were collected to minimize the effect from sample bias.

The time bins are referred to 2019 international chronostratigraphic chart with a temporal resolution of Epoch for most intervals. Some epochs with much longer durations (e.g., Early/Late Carboniferous and Early/Late Cretaceous) were divided into two bins to improve the temporal resolution. The average duration of the 34 time bins is  $15.8 \pm 7.4$  Myr (million years).

The statistical analysis to yield Phanerozoic dolomite abundance was performed by R program (version 3.3.1). The code performing the resampling process with 10,000 iterations is attached as follows:

```
#####Phanerozoic dolostone#####`  
dolodata = read.csv("C:\\Users\\DAI Xu\\Desktop\\dolodata.csv",header =  
TRUE)  
a = nrow(dolodata)  
x = rep(NA, a)  
doloab = function(n){  
  for (i in 1:a){  
    if(dolodata$timecode[i] == n){  
      x[i] = i  
    }  
  }  
}  
x = na.omit(x)  
bindata = dolodata[x,]  
b = nrow(bindata)  
meanab = rep(NA, 10000)  
for (j in 1:10000){  
  c = sample(b,size = 45, replace = F)
```

```

subdata = bindata[c,]
meanab[j] = mean(subdata$abundance)
}
hist(meanab)
c(mean(meanab),quantile(meanab,0.025),quantile(meanab,0.975))
}
doloresult = matrix (NA,34,3)
for (k in 1:34){
  doloresult[k,] = doloab(k)
}
write.table(doloresult, file = "C:\\Users\\DAI Xu\\Desktop\\doloresult.txt")

```

Before the correlation analysis of dolomite abundance, genus richness, and the rate of change of  $\delta^{34}\text{S}$ , these three variables were tested to justify whether they follow the normal distribution. Here, frequency and the Shapiro-Wilk test were performed by using SPSS software (SPSS version 22.0, SPSS) (Figs. S1-S6). The test results show that  $\delta^{34}\text{S}$  data shows a good pattern of normal distribution (Figs. S1-S2), dolomite abundance and genus richness show near normal distributions (Figs. S3-S6).

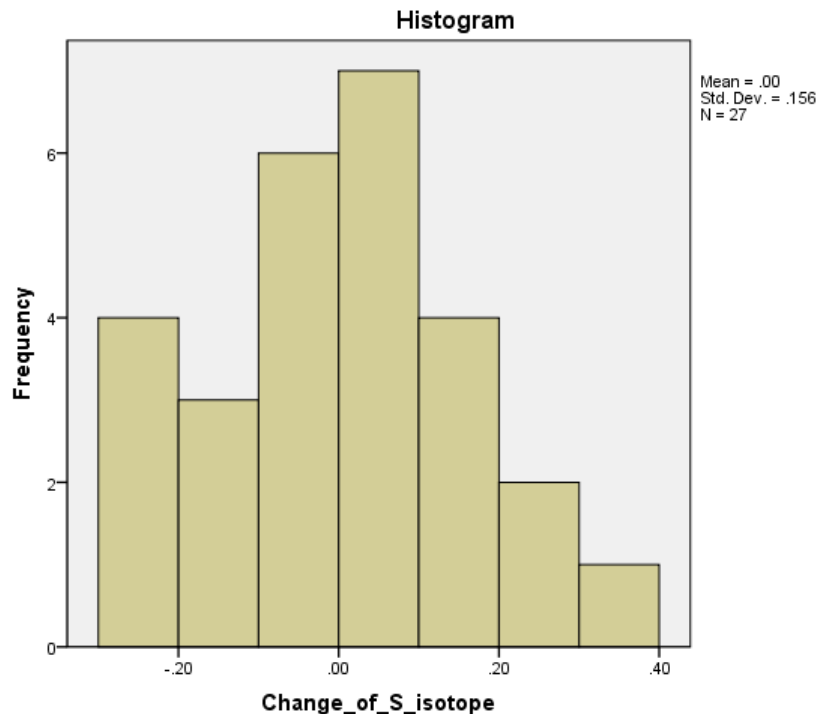

**Figure S1.** The frequency distribution of rate of change of  $\delta^{34}\text{S}$  showing a pattern of normal distribution with Asymp. Sig (2-tailed) being of 0.664 calculated from Shapiro-Wilk Test.

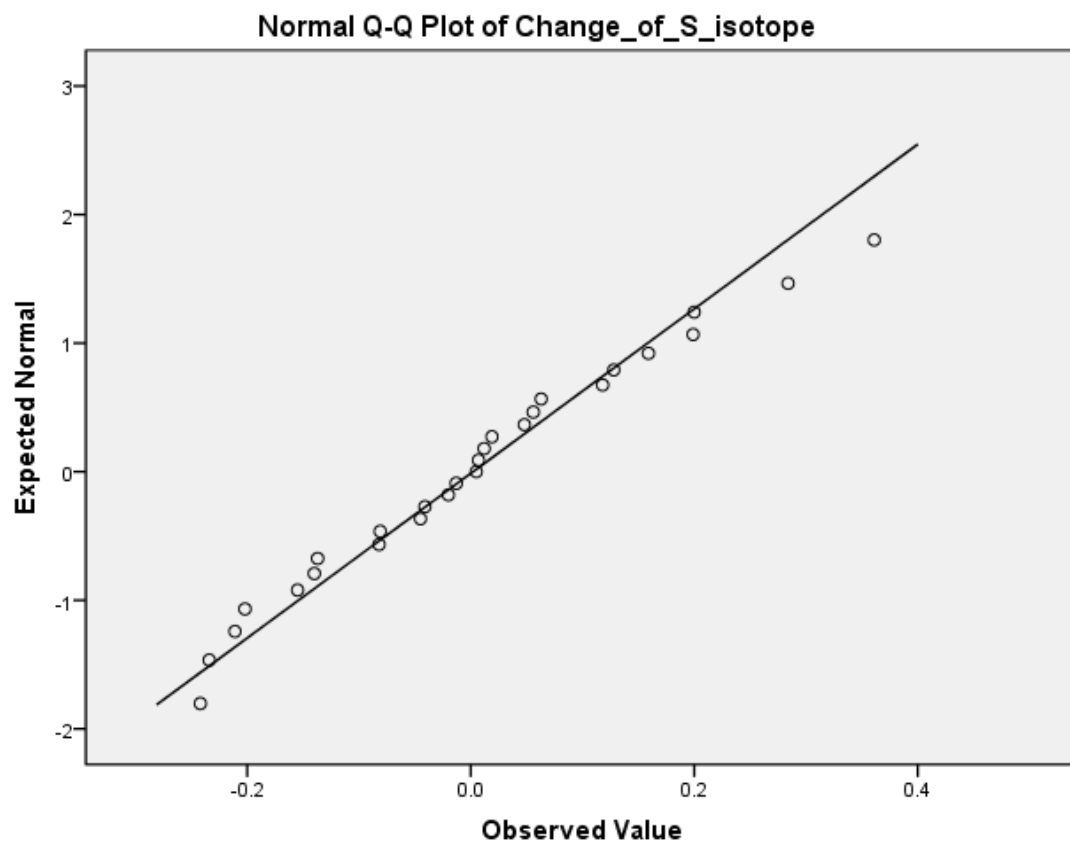

**Figure S2.** The normal Q-Q plot of rates of change in  $\delta^{34}\text{S}$  showing most data are in good agreement with regression line with few deviated from the regression line.

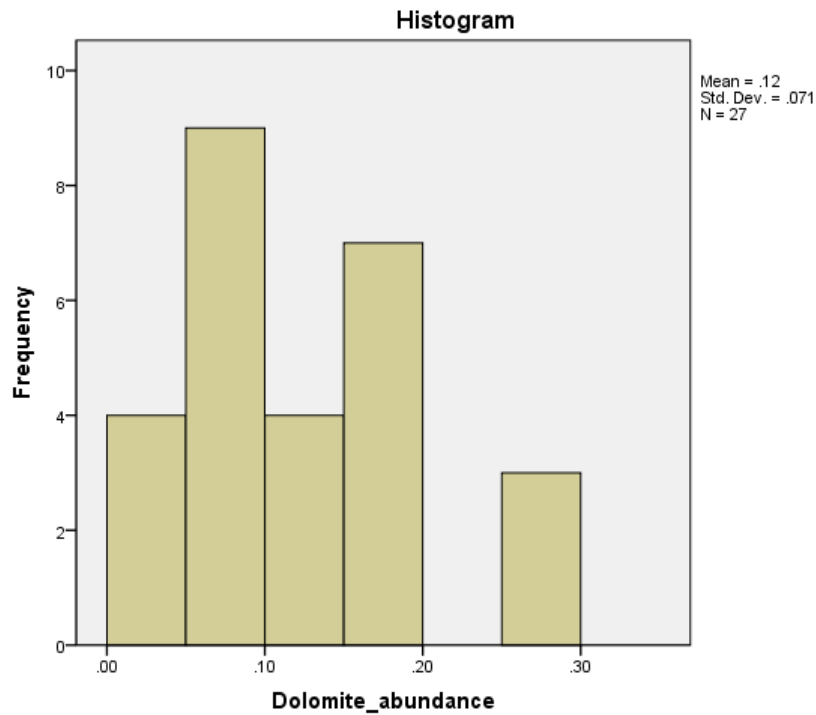

**Figure S3.** The frequency distribution of Phanerozoic dolomite abundance showing near-normal distribution pattern with Asymp. Sig (2-tailed) being of 0.01 calculated from Shapiro-Wilk Test.

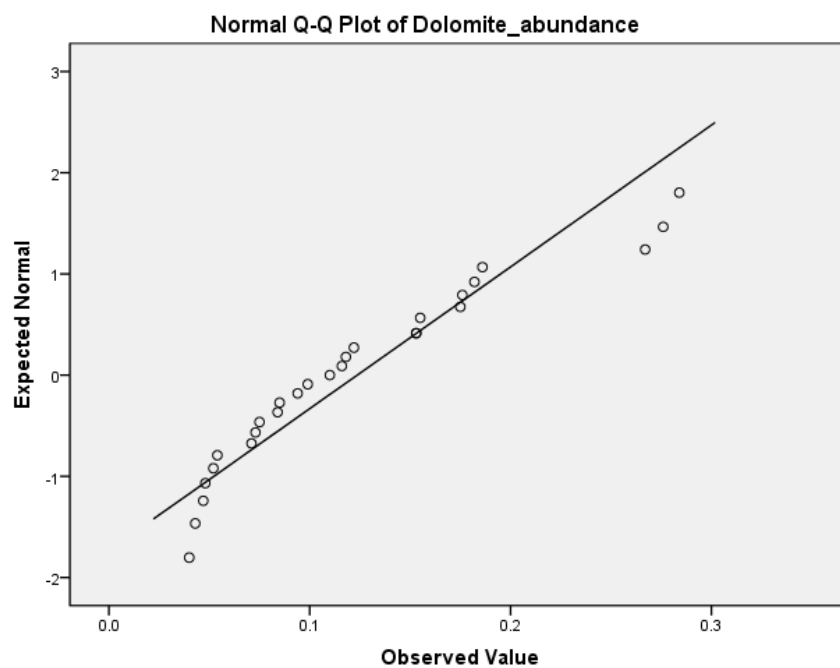

**Figure S4.** The normal Q-Q plot of Phanerozoic dolomite abundance showing most data are in agreement with the regression line, but with a few deviated from the trend line.

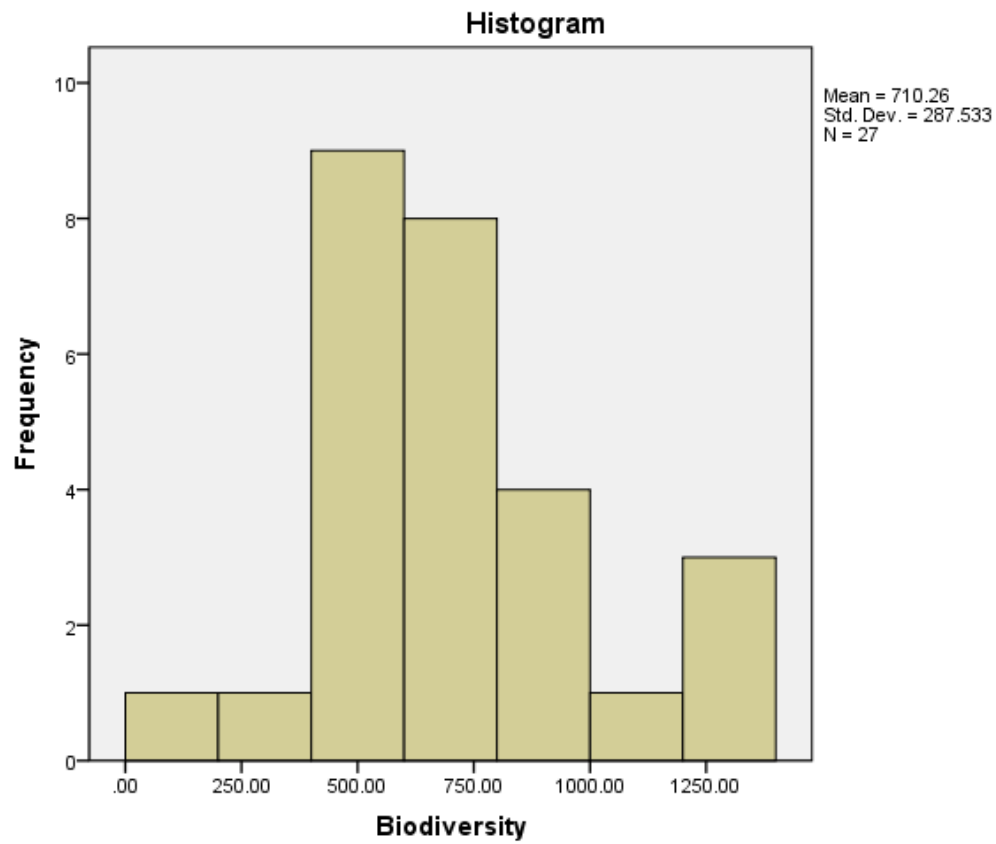

**Figure S5.** The frequency distribution of biodiversity (genus richness of marine benthic invertebrates) showing a pattern of normal distribution with Asymp. Sig (2-tailed) being of 0.237 calculated from Shapiro-Wilk Test.

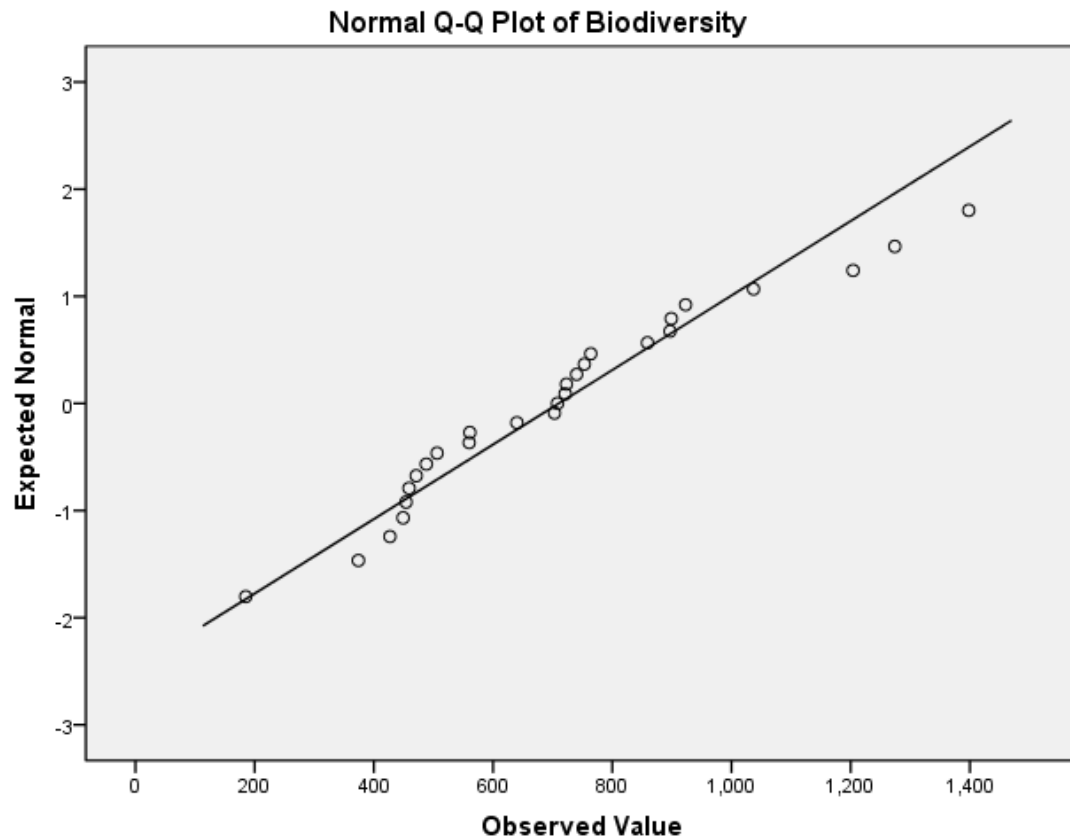

**Figure S6.** The normal Q-Q plot of Phanerozoic biodiversity (genus richness of marine benthic invertebrates) showing most data lie on the regression line with few deviated from it.

**Table S1.** Number of sections and countries for each time bin.

| <b>Time bin</b>         | <b>Number of Sections</b> | <b>Number of countries represented</b> |
|-------------------------|---------------------------|----------------------------------------|
| Terreneuvian            | 53                        | 12                                     |
| Series2                 | 63                        | 9                                      |
| Series3                 | 55                        | 16                                     |
| Furongian               | 51                        | 17                                     |
| Early Ordovician        | 51                        | 15                                     |
| Middle Ordovician       | 53                        | 8                                      |
| Late Ordovician         | 59                        | 13                                     |
| Llandovery              | 54                        | 11                                     |
| Wenlock                 | 54                        | 14                                     |
| Ludlow-Pridoli          | 66                        | 17                                     |
| Early Devonian          | 60                        | 16                                     |
| Middle Devonian         | 55                        | 12                                     |
| Late Devonian           | 62                        | 13                                     |
| Tournaisian-Visean      | 67                        | 16                                     |
| Serpukhovian            | 115                       | 15                                     |
| Bashkirian              |                           | 12                                     |
| Moscovian-Gzhelian      | 55                        | 11                                     |
| Cisuralian              | 56                        | 12                                     |
| Guadalupian             | 52                        | 13                                     |
| Lopingian               | 50                        | 17                                     |
| Early Triassic          | 61                        | 14                                     |
| Middle Triassic         | 61                        | 15                                     |
| Late Triassic           | 57                        | 19                                     |
| Early Jurassic          | 61                        | 20                                     |
| Middle Jurassic         | 53                        | 21                                     |
| Late Jurassic           | 58                        | 21                                     |
| Berriasian-Barremian    | 52                        | 19                                     |
| Aptian-Albian           | 59                        | 19                                     |
| Cenomanian-Coniacian    | 75                        | 20                                     |
| Santonian-Maastrichtian | 51                        | 18                                     |
| Paleocene               | 72                        | 20                                     |
| Eocene                  | 87                        | 21                                     |
| Oligocene               | 52                        | 20                                     |
| Miocene                 | 55                        | 12                                     |

**Table S2.** Sulfur isotope composition in Phanerozoic marine carbonate (from Kampschulte and Strauss, 2004, Prokoph et al., 2008, Hannisdal and Peters, 2011).

| Time bin          | Age (Ma) | $\delta^{34}\text{S}$ (‰) | Rate of change of $\delta^{34}\text{S}$ (‰ Myr <sup>-1</sup> ) |
|-------------------|----------|---------------------------|----------------------------------------------------------------|
| Series 3          | 498.9    | 32.638                    | -0.217                                                         |
| Furongian         | 494.65   | 31.714                    | -0.152                                                         |
|                   | 490.4    | 31.067                    | -0.138                                                         |
| Lower Ordovician  | 483.45   | 30.107                    | -0.242                                                         |
|                   | 475.2    | 28.112                    | -0.199                                                         |
| Middle Ordovician | 467.9    | 26.658                    | -0.083                                                         |
|                   | 462.45   | 26.205                    | -0.544                                                         |
|                   | 459.95   | 24.846                    | -0.099                                                         |
| Upper Ordovician  | 456.25   | 24.477                    | -0.009                                                         |
|                   | 451.75   | 24.434                    | 0.112                                                          |
|                   | 446.85   | 24.984                    | 0.282                                                          |
| Llandovery        | 441.35   | 26.536                    | 0.524                                                          |
|                   | 437.5    | 28.553                    | -0.124                                                         |
| Wenlock           | 432.1    | 27.884                    | -0.137                                                         |
| Ludlow            | 425.55   | 26.987                    | -0.057                                                         |
| Pridoli           | 420.8    | 26.714                    | -0.411                                                         |
| Lower Devonian    | 417.35   | 25.297                    | -0.311                                                         |
|                   | 413.6    | 24.131                    | -0.711                                                         |
|                   | 409.1    | 20.93                     | -0.280                                                         |
|                   | 402.25   | 19.01                     | 0.089                                                          |
|                   | 394.65   | 19.687                    | 0.159                                                          |
| Middle Devonian   | 388.55   | 20.655                    | 0.159                                                          |
| Upper Devonian    | 379.9    | 22.031                    | -0.047                                                         |
|                   | 366.85   | 21.423                    | -0.115                                                         |
| Tournaisian       | 353.6    | 19.902                    | -0.175                                                         |
| Visean            | 344      | 18.222                    | -0.317                                                         |
|                   | 336.5    | 15.848                    | -0.113                                                         |
| Serpukhovian      | 325.55   | 14.609                    | 0.018                                                          |
| Moscovian         | 314.9    | 14.8                      | -0.222                                                         |
|                   | 309.85   | 13.678                    | -0.148                                                         |
|                   | 307.25   | 13.294                    | -0.380                                                         |
| Kasimovian        | 305.75   | 12.724                    | -0.038                                                         |
| Gzhelian          | 302      | 12.581                    | 0.015                                                          |



|                 |        |        |        |
|-----------------|--------|--------|--------|
| Cisuralian      | 289.5  | 12.768 | 0.028  |
|                 | 275.3  | 13.168 | 0.098  |
| Guadalupian     | 265.5  | 14.133 | 0.284  |
| Lopingian       | 255.7  | 16.916 | 0.361  |
| Lower Triassic  | 248    | 19.698 | 0.199  |
| Middle Triassic | 241    | 21.091 | -0.041 |
| Upper Triassic  | 232.5  | 20.74  | -0.162 |
|                 | 222.25 | 19.083 | -0.077 |
|                 | 208.05 | 17.993 | -0.008 |
| Lower Jurassic  | 198.05 | 17.911 | -0.073 |
|                 | 193.05 | 17.544 | 0.001  |
|                 | 186.3  | 17.548 | 0.017  |
|                 | 179.3  | 17.668 | 0.004  |
| Middle Jurassic | 173.6  | 17.689 | -0.068 |
|                 | 169.65 | 17.42  | -0.086 |
|                 | 166.2  | 17.124 | -0.157 |
| Upper Jurassic  | 162.95 | 16.615 | -0.102 |
|                 | 158.45 | 16.154 | -0.031 |
|                 | 153.25 | 15.993 | 0.063  |
|                 | 148.15 | 16.315 | 0.061  |
| Berriasian      | 142.85 | 16.637 | 0.077  |
| Valanginian     | 138.3  | 16.986 | 0.031  |
|                 | 133.2  | 17.144 | 0.041  |
| Barrermian      | 127.5  | 17.375 | -0.127 |
| Aptian          | 118.5  | 16.236 | -0.027 |
| Albian          | 105.8  | 15.898 | 0.262  |
| Cenomanian      | 96.55  | 18.324 | 0.064  |
| Turonian        | 91.4   | 18.652 | -0.089 |
| Coniacian       | 87.55  | 18.31  | -0.109 |
| Santonian       | 84.65  | 17.993 | 0.078  |
| Campanian       | 77.05  | 18.589 | 0.029  |
| Maastrichtian   | 68.05  | 18.852 | -0.050 |
| Paleocene       | 63.6   | 18.626 | -0.150 |
|                 | 58.75  | 17.898 | 0.246  |
| Eocene          | 52.2   | 19.512 | 0.361  |
|                 | 44.5   | 22.295 | -0.004 |
|                 | 38.8   | 22.271 | -0.062 |

|           |        |        |        |
|-----------|--------|--------|--------|
|           | 35.55  | 22.069 | -0.071 |
| Oligocene | 31.15  | 21.757 | -0.019 |
|           | 25.715 | 21.653 | 0.033  |
| Miocene   | 21.73  | 21.785 | 0.027  |
|           | 18.2   | 21.879 | 0.028  |
|           | 14.81  | 21.974 | 0.060  |
|           | 12.629 | 22.104 | -0.011 |
|           | 9.427  | 22.067 | -2.341 |

**Table S3.** Dolomite abundance, rate of change of  $\delta^{34}\text{S}$  and genus richness of marine benthic invertebrates for each time bin in the Phanerozoic. Dolomite abundance data are from Data Repository File DR1, sulfur isotope data are from Table DR2, and fossil data are from the Paleobiology Database (PBDB; <https://paleobiodb.org>).

| Time bin           | Dolomite abundance | Rate of change of $\delta^{34}\text{S}$ (‰ Myr) | Genus richness |
|--------------------|--------------------|-------------------------------------------------|----------------|
| Terreneuvian       | 0.4097             |                                                 | 39             |
| Series2            | 0.2127             |                                                 | 271            |
| Series3            | 0.1669             | -0.217                                          | 24             |
| Furongian          | 0.1750             | -0.145                                          | 3              |
| Early Ordovician   | 0.1794             | -0.220                                          | 350            |
| Middle Ordovician  | 0.0523             | -0.242                                          | 471            |
| Late Ordovician    | 0.1553             | 0.128                                           | 703            |
| Llandovery         | 0.2759             | 0.200                                           | 454            |
| Wenlock            | 0.1527             | -0.137                                          | 561            |
| Ludlow-Pridoli     | 0.0538             | -0.234                                          | 506            |
| Early Devonian     | 0.0728             | -0.211                                          | 859            |
| Middle Devonian    | 0.0942             | 0.159                                           | 923            |
| Late Devonian      | 0.1759             | -0.081                                          | 560            |
| Tournaisian-Visean | 0.1159             | -0.202                                          | 708            |
| Serpukhovian       | 0.0476             | 0.018                                           | 509            |
| Bashkirian         | 0.0506             |                                                 |                |
| Moscovian-Gzhelian | 0.0838             | -0.155                                          | 449            |
| Cisuralian         | 0.1100             | 0.063                                           | 740            |
| Guadalupian        | 0.1525             | 0.284                                           | 897            |

|                         |        |        |      |
|-------------------------|--------|--------|------|
| Lopingian               | 0.2839 | 0.361  | 753  |
| Early Triassic          | 0.2666 | 0.199  | 185  |
| Middle Triassic         | 0.1863 | -0.041 | 488  |
| Late Triassic           | 0.1815 | -0.082 | 723  |
| Early Jurassic          | 0.1224 | -0.013 | 374  |
| Middle Jurassic         | 0.0400 | -0.100 | 459  |
| Late Jurassic           | 0.0715 | -0.002 | 764  |
| Berriasian-Barremian    | 0.0850 | 0.005  | 427  |
| Aptian-Albian           | 0.0750 | 0.118  | 899  |
| Cenomanian-Coniacian    | 0.0478 | -0.045 | 640  |
| Santonian-Maastrichtian | 0.0472 | 0.019  | 1037 |
| Paleocene               | 0.1755 | 0.048  | 721  |
| Eocene                  | 0.0993 | 0.056  | 1398 |
| Oligocene               | 0.0430 | 0.007  | 1204 |
| Miocene                 | 0.1182 | 0.012  | 1274 |

## REFERENCES

- Hannisdal, B., and Peters, S.E., 2011, Phanerozoic Earth system evolution and marine biodiversity: *science*, v. 334, p. 1121–1124,  
<https://doi.org/10.1126/science.1210695>.
- Kampschulte, A., and Strauss, H., 2004, The sulfur isotopic evolution of Phanerozoic seawater based on the analysis of structurally substituted sulfate in carbonates: *Chemical Geology*, v. 204, p. 255–286,  
<https://doi.org/10.1016/j.chemgeo.2003.11.013>
- Prokoph, A., Shields, G.A., and Veizer, J., 2008, Compilation and time-series analysis of a marine carbonate  $\delta^{18}\text{O}$ ,  $\delta^{13}\text{C}$ ,  $^{87}\text{Sr}/^{86}\text{Sr}$  and  $\delta^{34}\text{S}$  database through Earth history: *Earth-Science Reviews*, v. 87, p. 113–133,  
<https://doi.org/10.1016/j.earscirev.2007.12.003>
